# Supplementary material
Source: Springer Nature journal article supplement (https://www.springermedizin.de/resource/supplementary/40478_2013_14_MOESM5_ESM.pdf/25657958)

**A****DRG**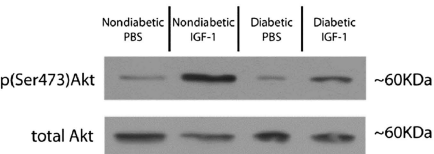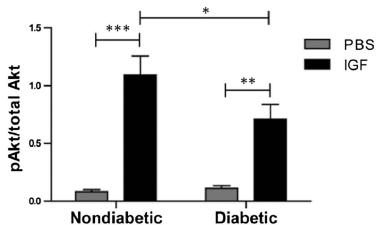**B****Sciatic Nerve**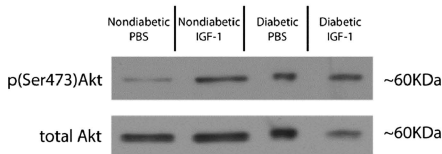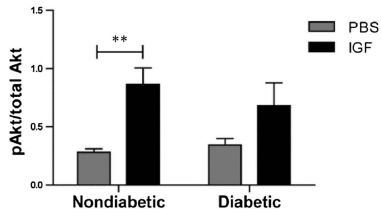

Supplement: MOESM5 [file 25657958]
